# Supplementary material for: Interfacing a heteropolytungstate complex and gelatin through a coacervation process: design of bionanocomposite films as novel electrocatalysts
Source: Royal Society of Chemistry journal article supplement (doi:10.1039/c4ta01142b), 2014-01-01
Supplement: c4ta01142b1.pdf [file c4ta01142b1.pdf]

**ELECTRONIC SUPPLEMENTARY INFORMATION (ESI) for**

**Interfacing an heteropolytungstate complex and gelatin through a coacervation process: design of bionanocomposite films as novel electrocatalyst.**

Basma Khadro, Imane Baroudi, Anne-Marie Goncalves, Bruno Berini, Bruce Pegot, Farid Nouar, Thi Ngoc Ha Le, François Ribot, Christel Gervais, Florent Carn, Emmanuel Cadot, Christine Mousty, Corine Simonnet-Jégat, Nathalie Steunou.

**Table 1.** Main peaks in the FT-IR spectra of  $[\text{BW}_{12}\text{O}_{40}]^{5-}$ -G hybrid and corresponding assignments.

| Gelatin ( $\text{cm}^{-1}$ ) <sup>f</sup> | Gelatin (this work) ( $\text{cm}^{-1}$ ) | $[\text{BW}_{12}\text{O}_{40}]^{5-}$ ( $\text{cm}^{-1}$ ) <sup>g</sup> | $[\text{BW}_{12}\text{O}_{40}]^{5-}$ (this work) ( $\text{cm}^{-1}$ ) | $[\text{BW}_{12}\text{O}_{40}]^{5-}$ -G hybrid (this work) ( $\text{cm}^{-1}$ ) | Band assignments                                                                  |
|-------------------------------------------|------------------------------------------|------------------------------------------------------------------------|-----------------------------------------------------------------------|---------------------------------------------------------------------------------|-----------------------------------------------------------------------------------|
| 1630                                      | 1648 (vs)                                |                                                                        |                                                                       | 1646 (vs)                                                                       | $\nu(\text{C}=\text{O})$ , $\delta(\text{N}-\text{H})$                            |
| 1541                                      | 1543 (s)                                 |                                                                        |                                                                       | 1536 (s)                                                                        | $\delta(\text{N}-\text{H})$ , $\nu(\text{C}-\text{N})$ , $\nu(\text{C}-\text{C})$ |
| 1450                                      | 1452 (m)                                 |                                                                        |                                                                       | 1454 (m)                                                                        | $\delta(\text{CH}_2)$                                                             |
| 1410                                      | 1404 (sh)                                |                                                                        |                                                                       | 1405 (sh)                                                                       | $\nu(\text{COO})$                                                                 |
| 1334                                      | 1336 (w)                                 |                                                                        |                                                                       | 1336 (w)                                                                        | $\delta(\text{CH}_2)$ wagging                                                     |
| 12 35                                     | 1236 (w)                                 |                                                                        |                                                                       | 1238 (w)                                                                        | $\nu(\text{C}-\text{N})$ , $\delta(\text{N}-\text{H})$                            |
| 1080                                      | 1078 (w)                                 |                                                                        |                                                                       | 1078 (vw)                                                                       | Skeletal $\nu(\text{C}-\text{O})$                                                 |
|                                           |                                          | 960 (s)                                                                | 957 (s)                                                               | 956 (s)                                                                         | $\nu_{\text{as}}(\text{W}-\text{O}_{\text{d}})$                                   |
|                                           |                                          | 910 (s)                                                                | 916 (s)                                                               | 904(s)                                                                          | $\nu_{\text{as}}(\text{B}-\text{O}_{\text{a}})$                                   |
|                                           |                                          | 807 (vs)                                                               | 804 (vs)                                                              | 825(vs)                                                                         | $\nu_{\text{as}}(\text{W}-\text{O}_{\text{c}}-\text{W})$                          |

<sup>f</sup> H. Staroszczyk, J. Pielichowska, K. Sztuka, J. Stangret, I. Kołodziejaska, *Food Chem.*, 2012, **130**, 335.

<sup>g</sup> C. Rocchiccioli-Deltcheff, M. Fournier, R. Franck, R. Thouvenot, *Inorg. Chem.* 1983, **22**, 207-216.

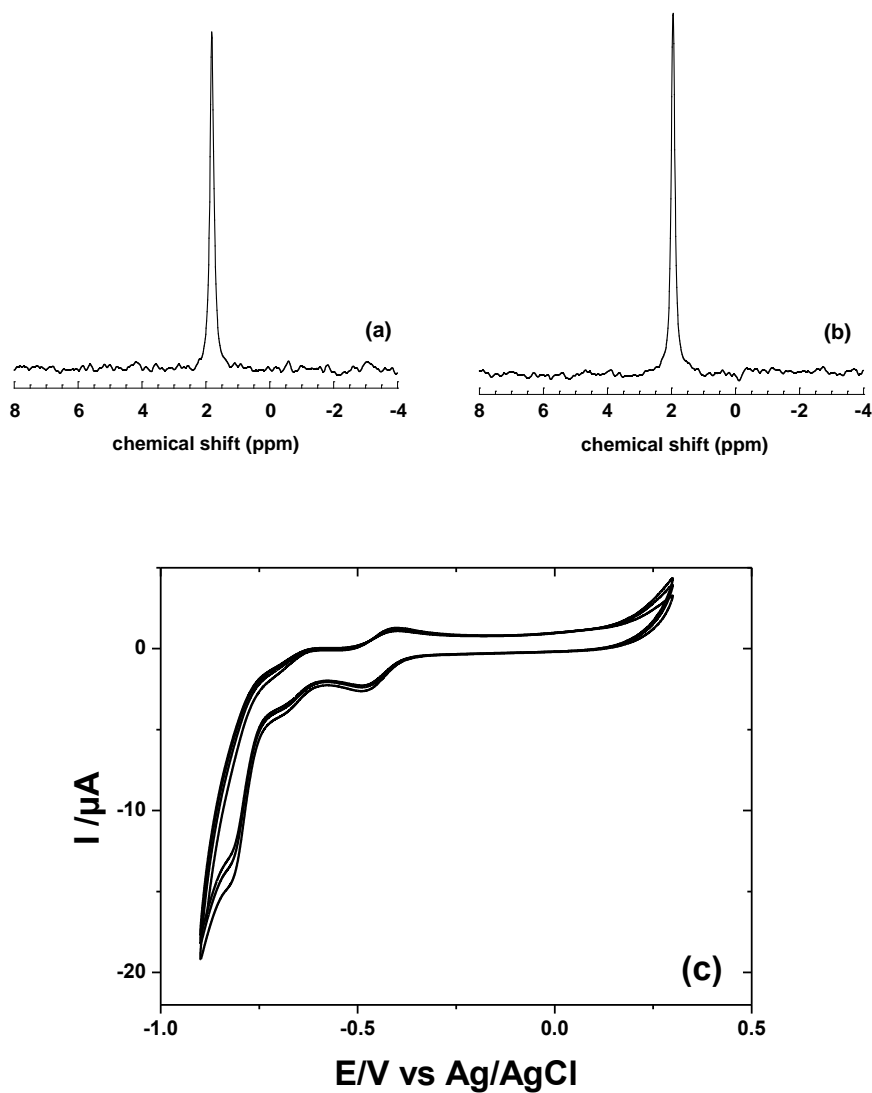

**Figure S1.** Characterization of  $[\text{BW}_{12}\text{O}_{40}]^{5-}$  in aqueous solution ; (a)-(b) Solution  $^{11}\text{B}$  NMR spectra of  $[\text{BW}_{12}\text{O}_{40}]^{5-}$  ( $c = 5 \cdot 10^{-4} \text{ M}$ ) at (a) pH 3 and (b) pH 4.7; (c) cyclic voltammogram of  $[\text{BW}_{12}\text{O}_{40}]^{5-}$  ( $c = 5 \cdot 10^{-4} \text{ mol.L}^{-1}$ ) in  $\text{CHCl}_2\text{COOH}/\text{CHCl}_2\text{COONa}$  1M-1M at pH 3, Electrolyte  $0.5 \text{ M Na}_2\text{SO}_4$  aqueous solution at pH 3. Scan rate:  $100 \text{ mV s}^{-1}$ .

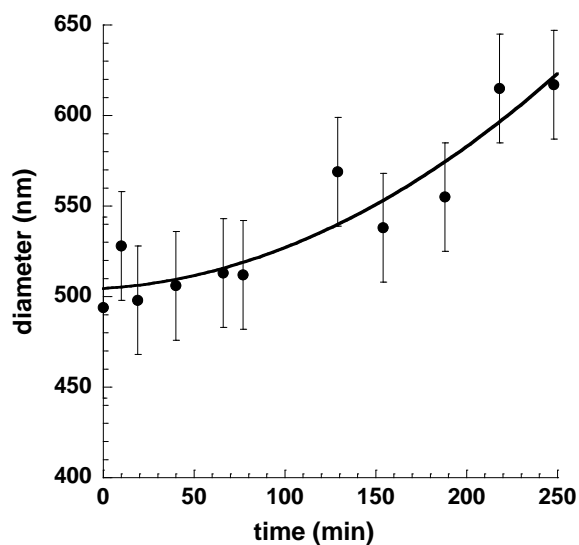

**Figure S2.** Evolution of colloids size (●) as measured by QELS upon ageing conditions without stirring ( $T = 40^{\circ}\text{C}$ ,  $\text{pH } 3$ ) for  $[\text{G}] = 0.375 \text{ mM}$  and  $[\text{BW}_{12}] = 0.23 \text{ mM}$ . The continuous line corresponds to a second order polynomial fit and should be used as a guide for the eyes.

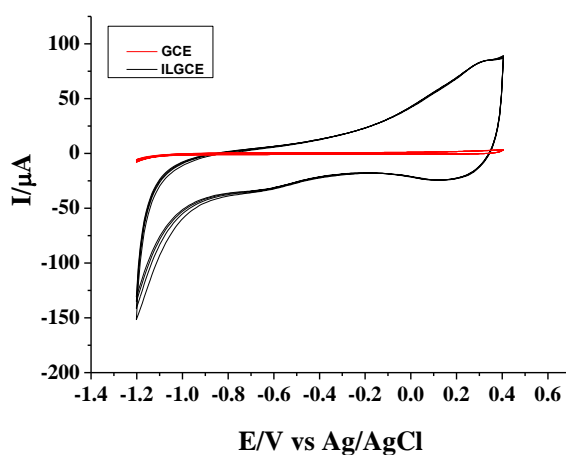

**Figure S3.** Cyclic voltammograms of GCE without ionic liquid and ILGCE (i. e. GCE modified with ionic liquid  $[\text{bmim}][\text{PF}_6]$ ) in  $0.5 \text{ M Na}_2\text{SO}_4$  aqueous solution at  $\text{pH } 3$ . Scan rate:  $100 \text{ mV s}^{-1}$ .

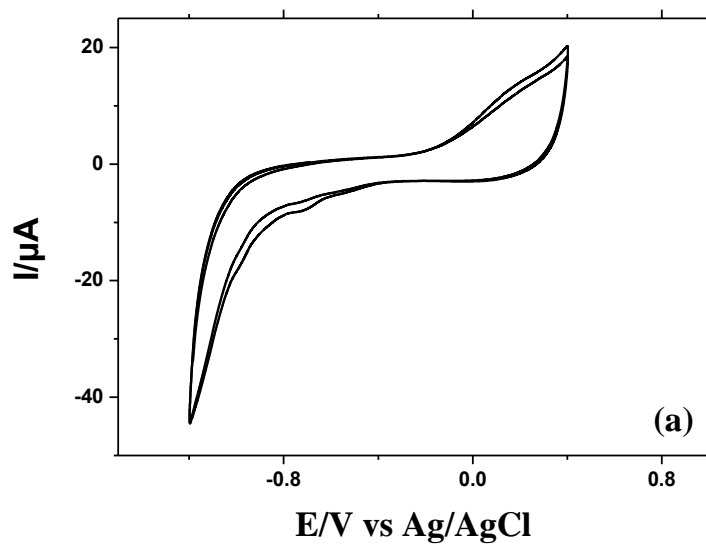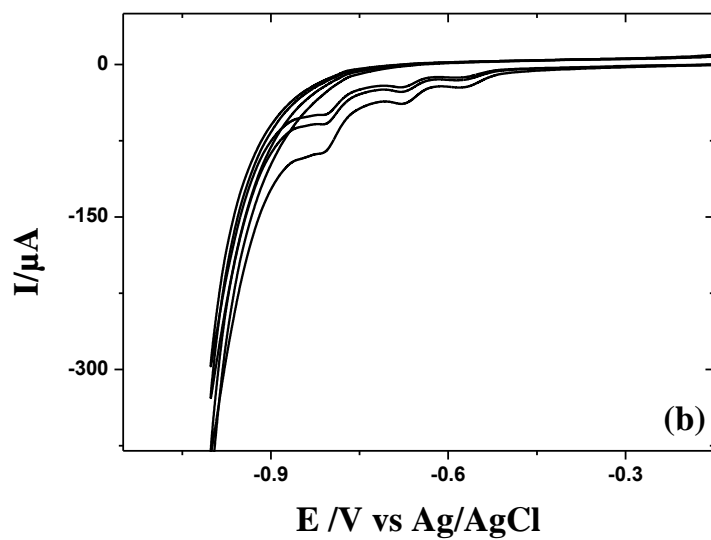

**Figure S4.** Cyclic voltammograms of (a) [BW<sub>12</sub>]-ILGCE, (b) [BW<sub>12</sub>]-G-ILGCE. Electrolyte 0.5 M Na<sub>2</sub>SO<sub>4</sub> aqueous solution at pH 3. Scan rate: 10 mV s<sup>-1</sup>.

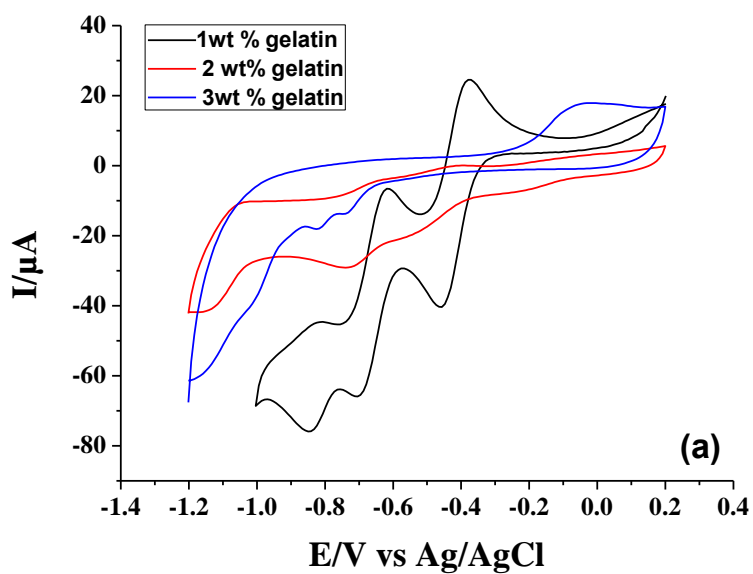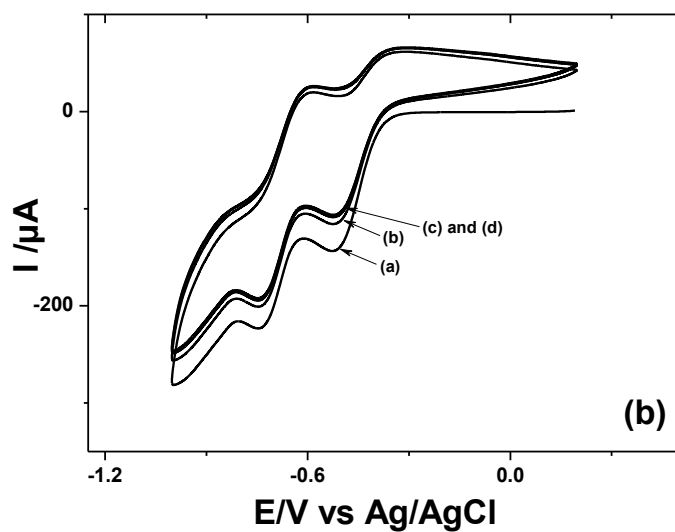

**Figure S5.** Cyclic voltammograms of (a) 2[BW<sub>12</sub>]-G-ILGCE prepared with 1, 2 and 3 wt% of gelatin. Electrolyte 0.5 M Na<sub>2</sub>SO<sub>4</sub> aqueous solution at pH 3. Scan rate: 10 mV s<sup>-1</sup>. (b) 2[BW<sub>12</sub>]-G-ILGCE in 0.5 M Na<sub>2</sub>SO<sub>4</sub> aqueous solution at pH 3 at different cyclic numbers: (a) 1<sup>st</sup>, (b) 2<sup>nd</sup>, (c) 49<sup>th</sup> and (d) 50<sup>th</sup> cycles. Scan rate: 100 mV s<sup>-1</sup>.

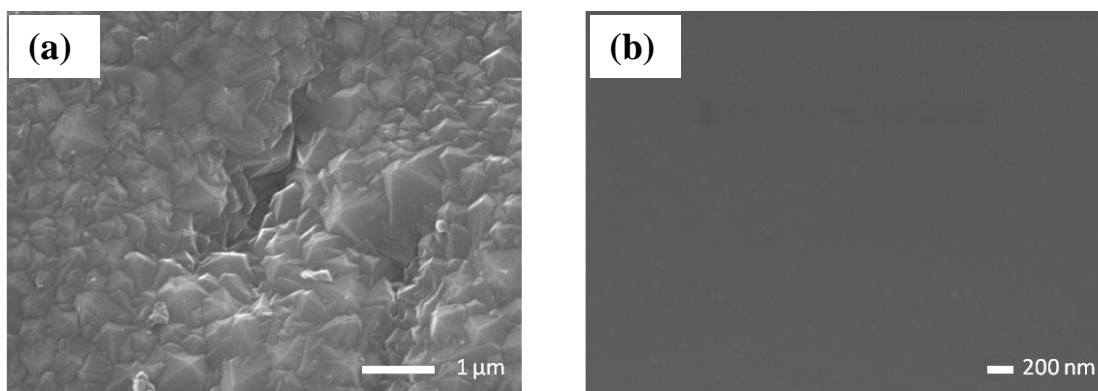

**Figure S6.** SEM images of (a) diamond wafer and (b) a gelatin film.

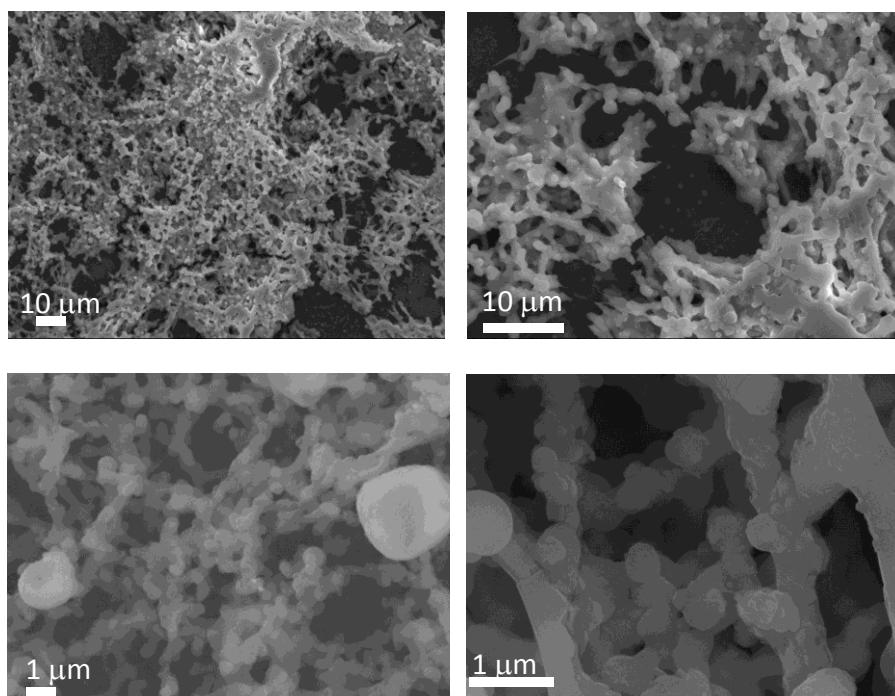

**Figure S7.** SEM images of 2[BW<sub>12</sub>]-G-IL coatings prepared by deposition of 2 x 10 μL of a 0.5 mM [BW<sub>12</sub>O<sub>40</sub>]<sup>5-</sup> solution and 10 μL of 1 wt% solution of gelatin.

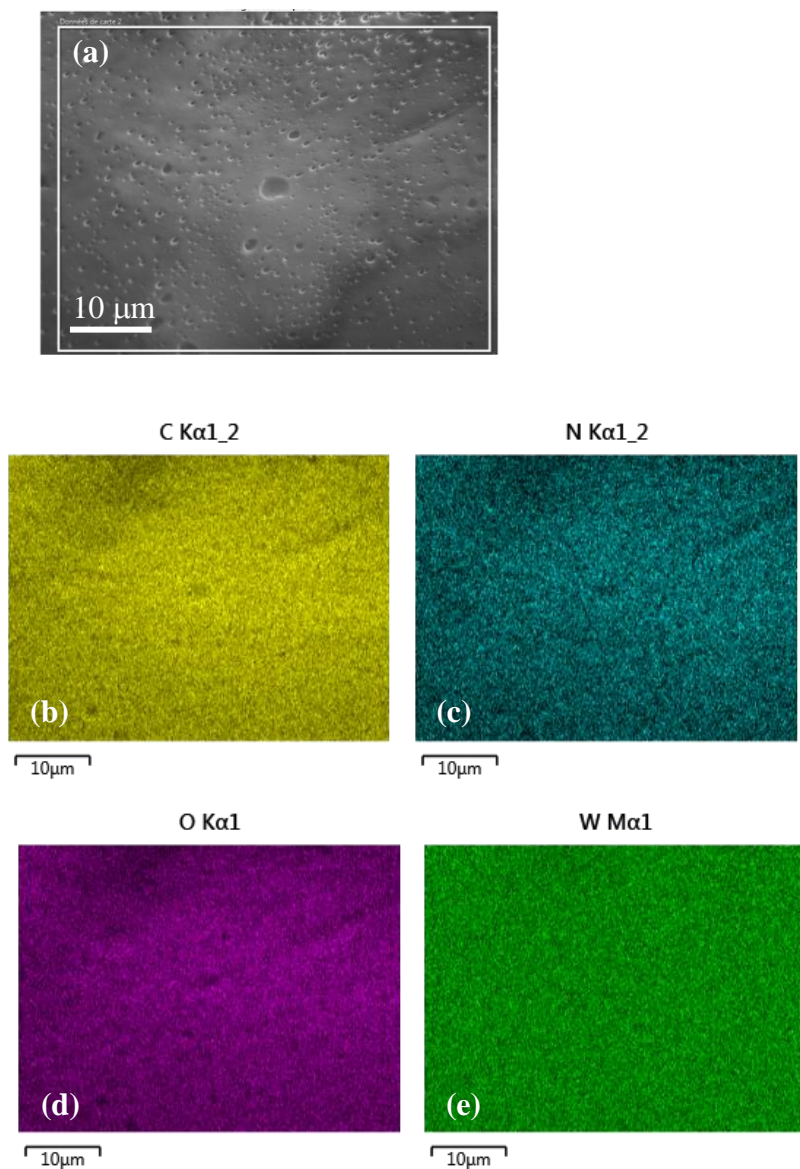

**Figure S8.** (a) SEM image of a 2[BW<sub>12</sub>]-G-IL coatings prepared from the deposition of 2 x 20 μL of a 0.5 mM [BW<sub>12</sub>O<sub>40</sub>]<sup>5-</sup> solution and 20 μL of 1 wt% solution of gelatin. (b-e) corresponding elemental mapping of carbon (b), nitrogen (c), oxygen (d) and tungsten (e) by EDX spectroscopy.
